# Supplementary material for: Comprehensive Analysis of microRNAs in Human Adult Erythropoiesis
Source: MDPI journal article supplement (doi:10.3390/cells10113018), 2021-11-04
Supplement: s1 [file s1]

Supplementary Material

# Comprehensive Analysis of microRNAs in Human Adult Erythropoiesis

Aneesha Nath <sup>1</sup>, Janakiram Rayabaram <sup>2</sup>, Smitha Ijee <sup>1,†</sup>, Abhirup Bagchi <sup>1,†</sup>, Anurag Dutta Chaudhury <sup>2</sup>, Debanjan Roy <sup>2,3</sup>, Karthik Chambayil <sup>1</sup>, Jyoti Singh <sup>4</sup>, Yukio Nakamura <sup>5</sup> and Shaji R. Velayudhan <sup>1,2,\*</sup>

<sup>1</sup> Center for Stem Cell Research (A Unit of InStem, Bengaluru, India), Christian Medical College, Vellore 632002, India; aneesha.micro@gmail.com (A.N.); smitha.ijee@cmcvellore.ac.in (S.I.); abhirup@cmcvellore.ac.in (A.B.); karthik.c@cmcvellore.ac.in (K.C.)

<sup>2</sup> Department of Haematology, Christian Medical College, Vellore 632004, India; janakiram.rayabaram@gmail.com (J.R.); anurag.dutta@cmcvellore.ac.in (A.D.C.); debanjan.roy@cmcvellore.ac.in (D.R.)

<sup>3</sup> Manipal Academy of Higher Education, Manipal 576119, India

<sup>4</sup> National Centre for Cell Science, University of Pune Campus, Pune 411007, India; jyotis@nccs.res.in

<sup>5</sup> Cell Engineering Division, RIKEN BioResource Research Center, Ibaraki 6491211, Japan; yukionak@brc.riken.jp

\* Correspondence: rvshaji@cmcvellore.ac.in; Tel.: +91-416-2285113

† Equal contribution.

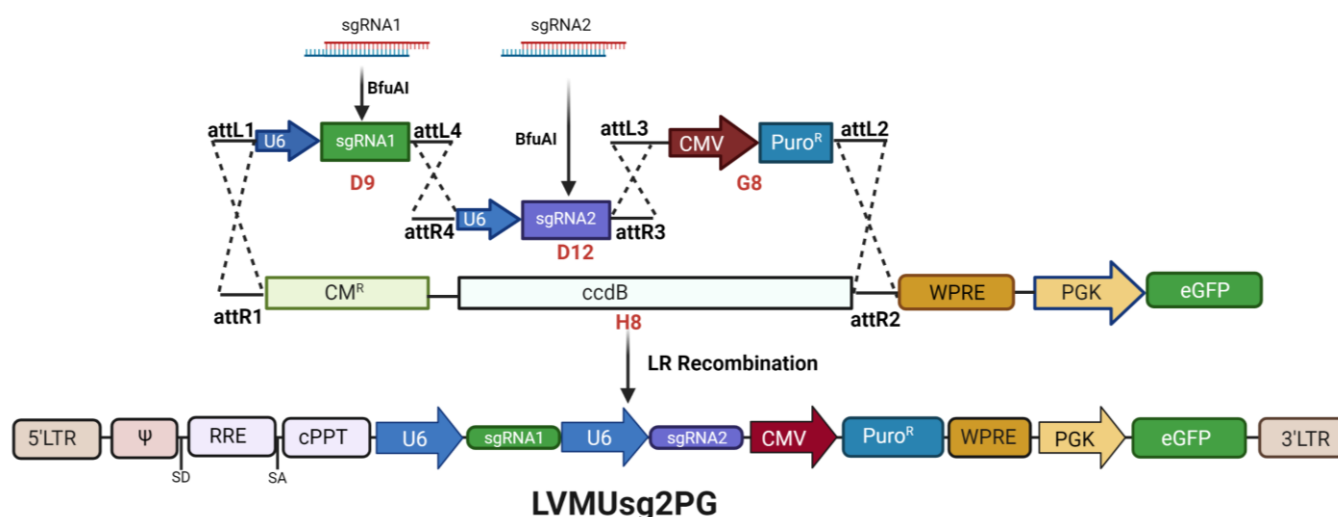

**Figure S1.** Cloning of d-sgRNAs using LR recombination to generate LVMUsg2PG. D9, D12: entry vectors used for cloning sgRNA1 and 2, respectively; G8: entry vector with puromycin resistance gene; H8: destination vector. CMV: human cytomegalovirus (CMV) immediate-early enhancer and promoter; PGK: phosphoglycerate kinase promoter; PuroR: puromycin resistance gene (PuroR), eGFP: enhanced green fluorescence protein, Ψ: psi packaging signal; RRE: rev response element; cPPT: central polypurine tract; LTR: long terminal repeats; WPRE: woodchuck hepatitis virus posttranscriptional regulatory element posttranscriptional regulatory element.

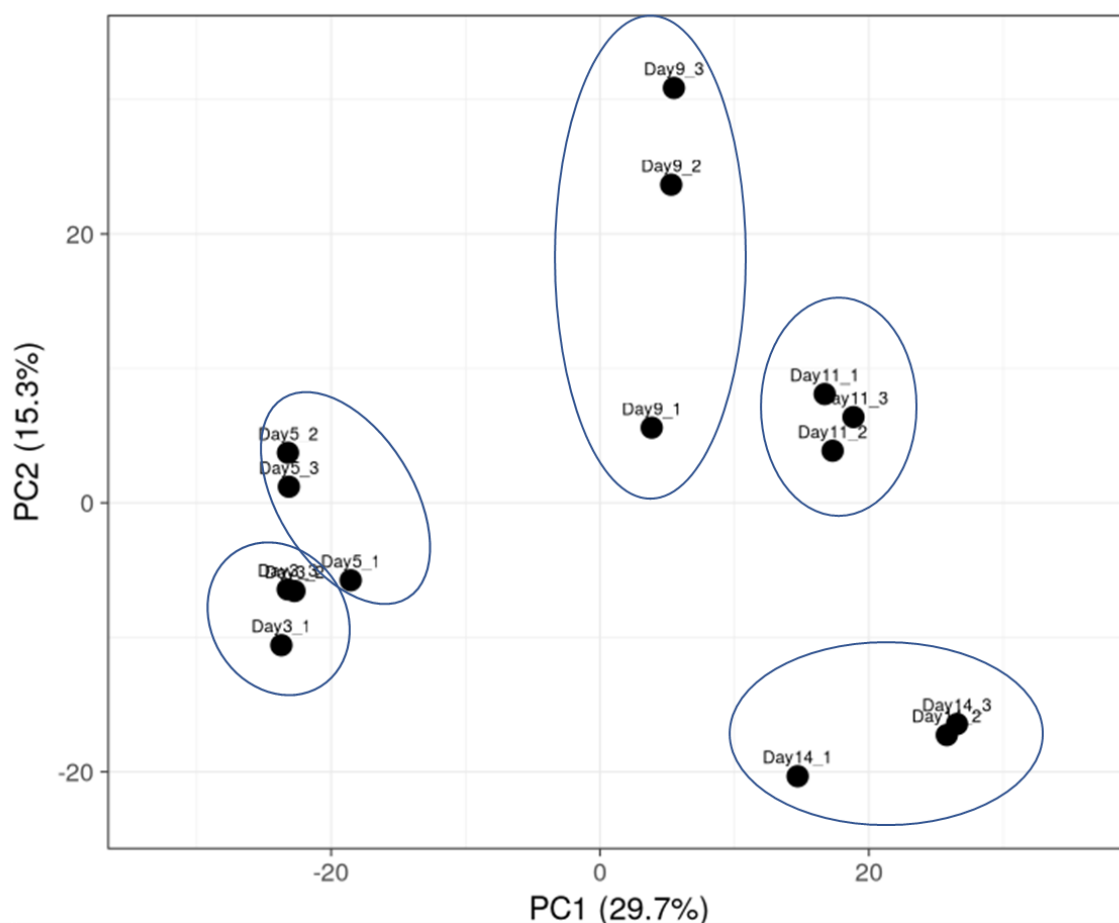

**Figure S2.** Principal component analysis of normalized miRNA reads from the small RNA analysis of the triplicate samples from four different time points in ex-vivo erythropoiesis. The samples from the same time points are circled.

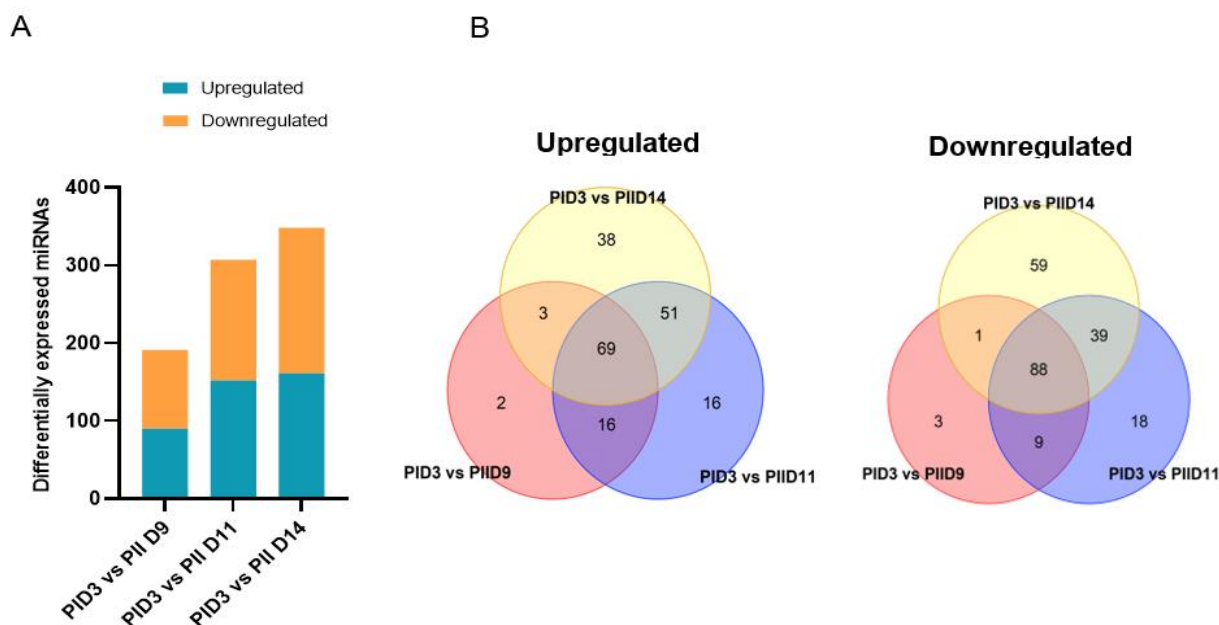

**Figure S3.** Differentially expressed with miRNAs in ex-vivo erythropoiesis ( $\log_2FC > 1.5$  or  $< -1.5$ ,  $p < 0.05$ ). (A) The total number of upregulated and downregulated miRNAs (B) Venn diagram showing the number of upregulated and down-regulated miRNAs in the cells from different time points of ex-vivo erythropoiesis. PIID9: Phase II Day 9, PIID11: Phase II Day 11, and PIID14: Phase II Day 14.

## DownmiRNA-Upgene

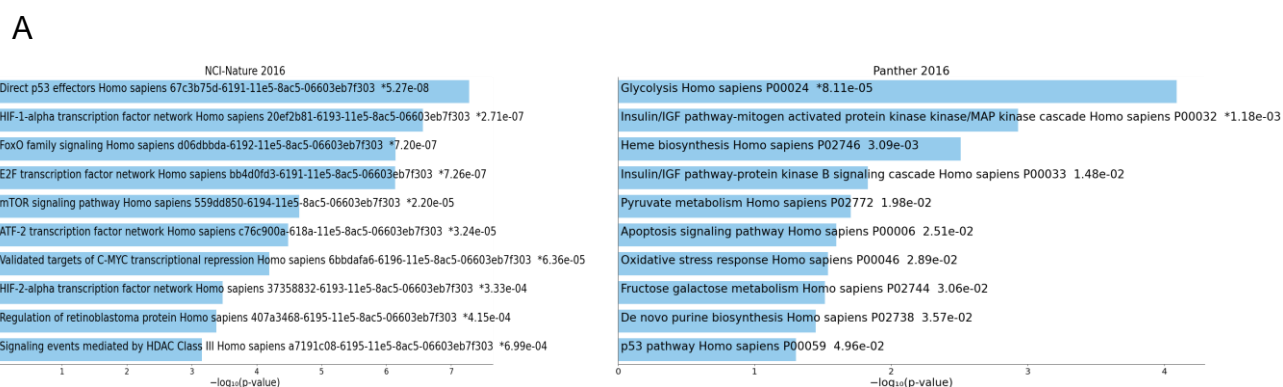

## UpmiRNA-Downgene

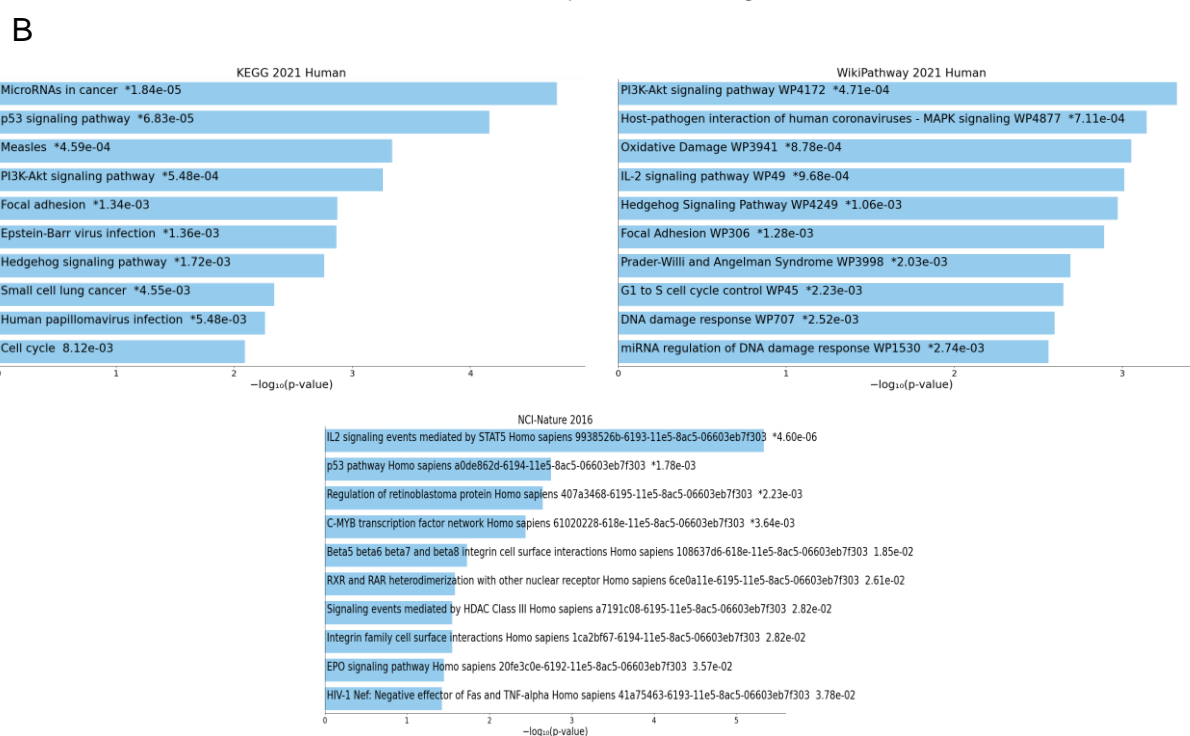

**Figure S4.** Significant pathways identified for (A) the genes in the *DownmiRNA-Upgene* group using NCI-Nature and Panther databases and (B) the genes in the *UpmiRNA-Downgene* group using KEGG, WikiPathway, and NCI Nature pathway databases.

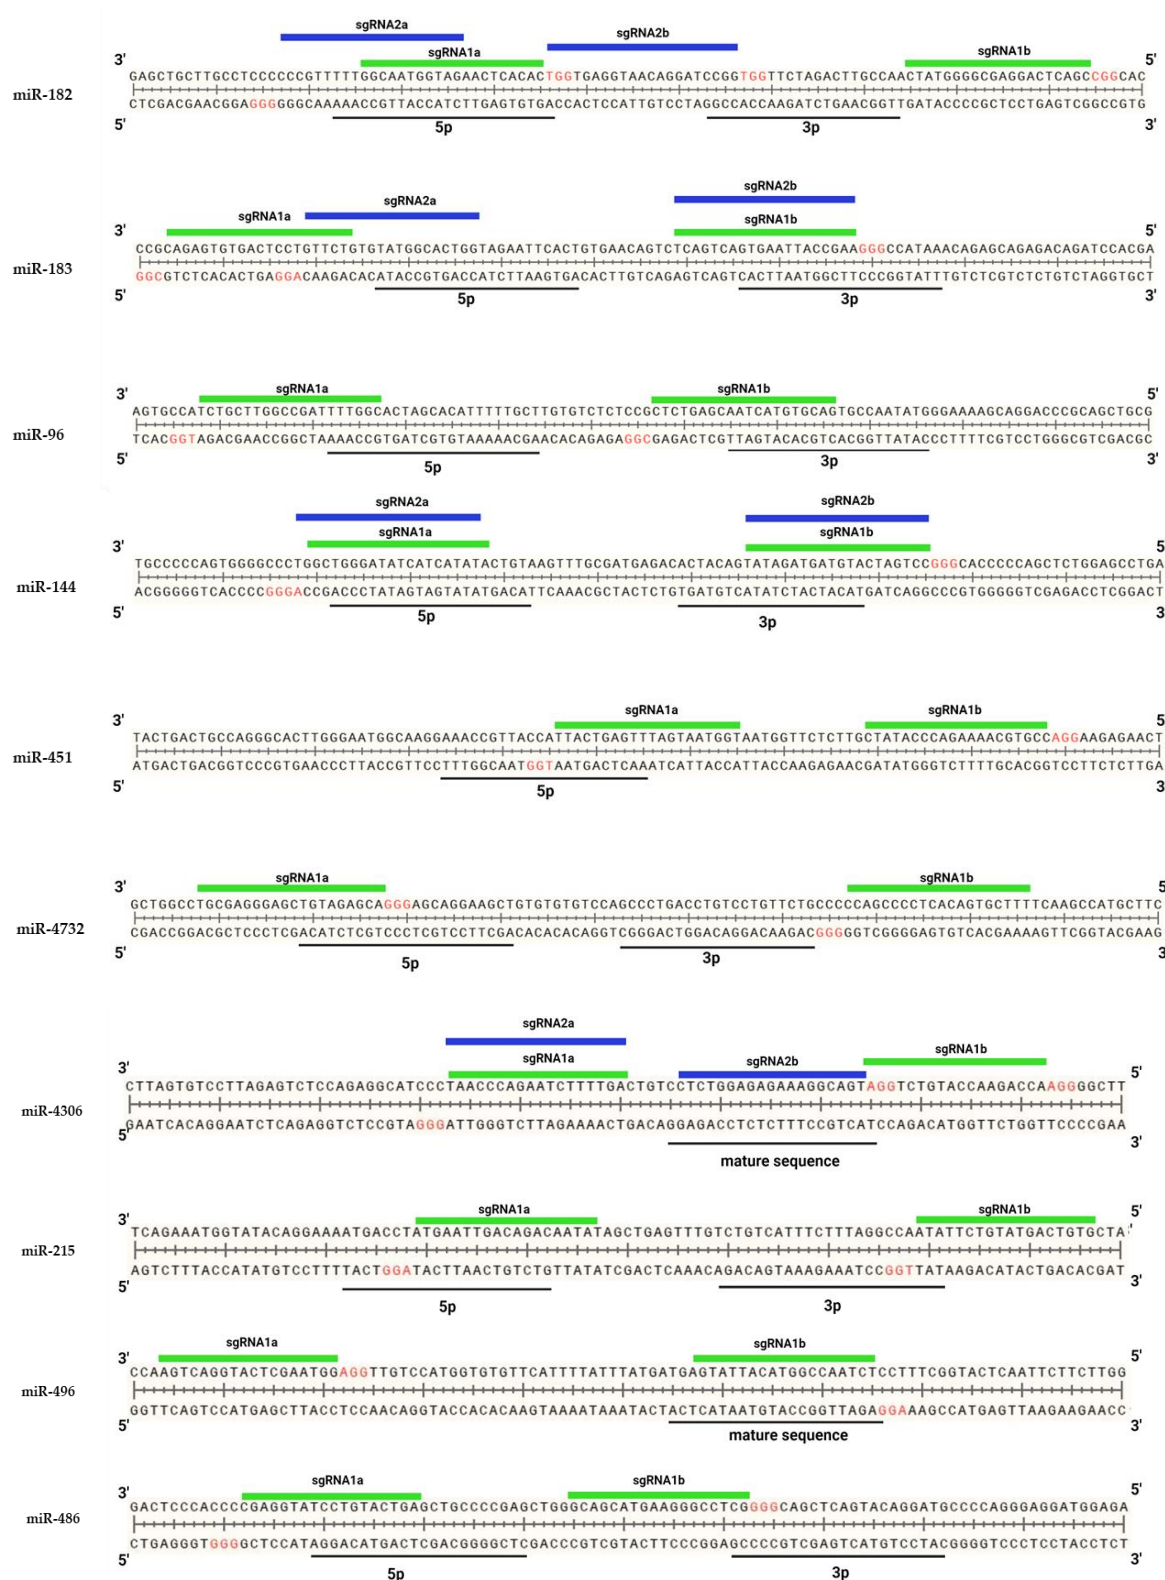

**Figure S5.** Position of the d-sgRNAs designed near the genomic regions of the miRNAs for CRISPR-Cas9-based editing. sgRNA 1a and sgRNA1b (Pair 1) and sgRNA 2a and sgRNA 2b (Pair 2) denote the pairs of d-sgRNAs designed for targeting the miRNAs. For some miRNAs, Pair 2 could not be designed due to the high off-target scores and low on-target scores and restriction of available PAM sites around the miRNA biogenesis processing sites that are present at the 5' and 3' ends of the 5p and 3p mature miRNA sequences.

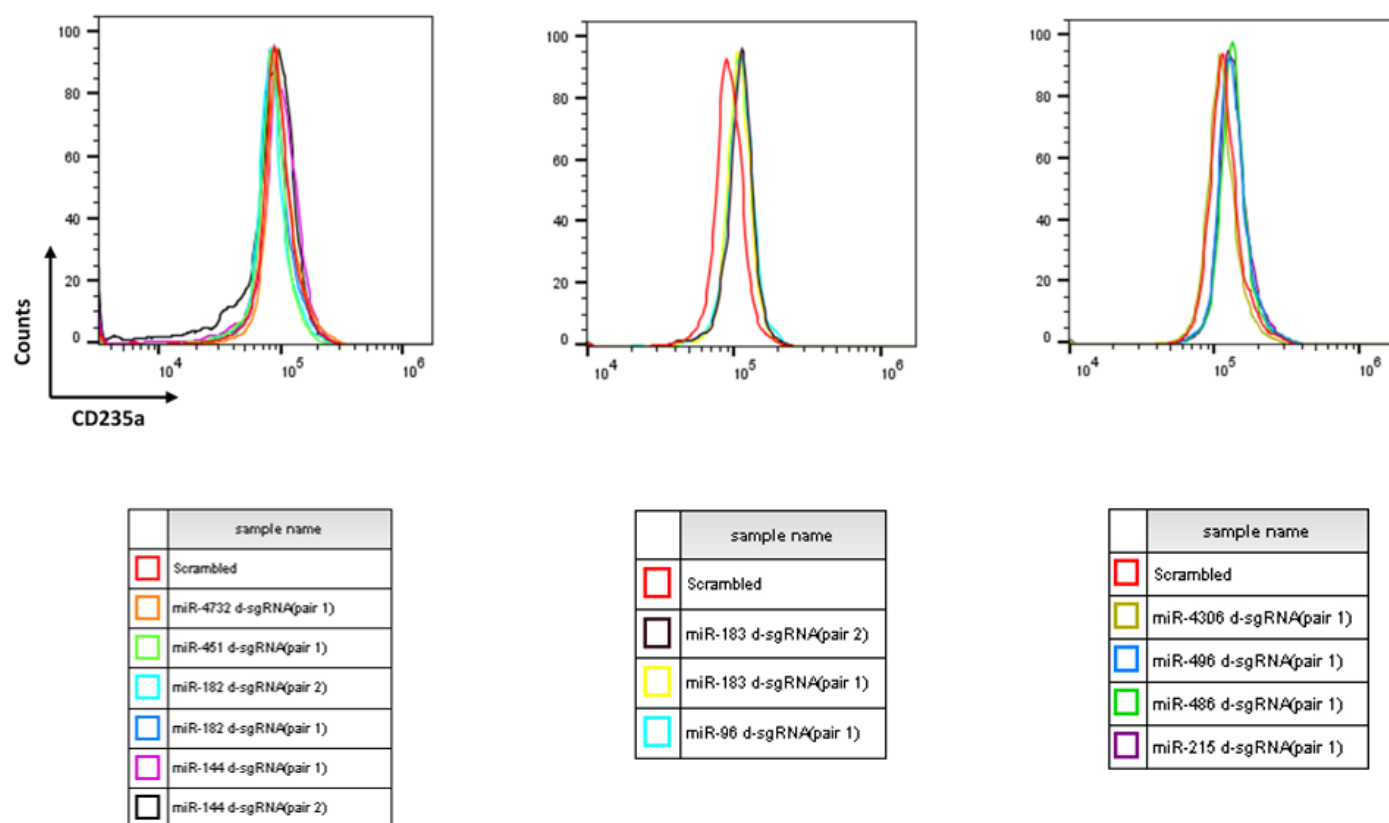

**Figure S6.** CD235a expression in the differentiated HUDEP-Cas9 cells after miRNA downregulation. The experiments were carried out in three batches. The CD235a expression of the miRNA edited cells was compared to the control cells transduced with scrambled gRNAs.

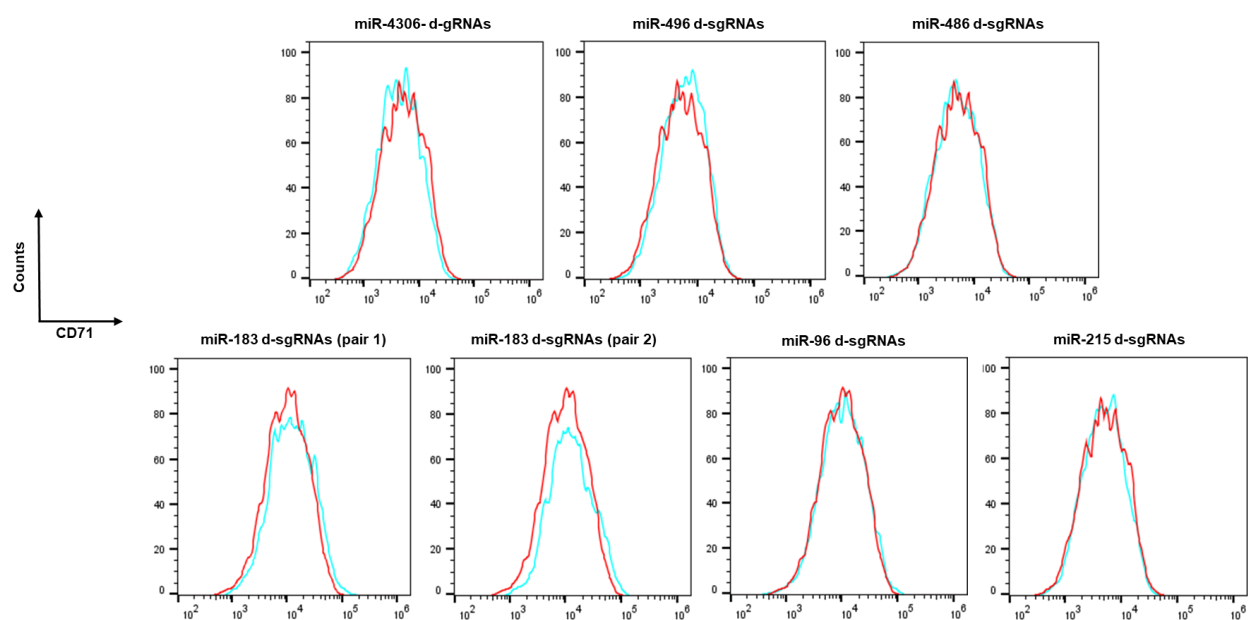

**Figure S7.** Flow cytometry analysis of CD71 expression in the differentiated Cas9-HUDEP-2 cells after editing miR-4306, 496, 486, 183, 96, and 215. The red lines in the graphs indicate the results from the scrambled d-sgRNA and the blue line indicates the results from the d-sgRNAs targeting the miRNAs. For mir-183, two pairs of d-sgRNAs were used.

**Table S1.** Sequences of the forward primers used for real-time PCR analysis of miRNA expression.

| miRNA           | Primer Name   | Sequence                 |
|-----------------|---------------|--------------------------|
| hsa-miR-182-5p  | miR182-5p-F1  | TTGGCAATGGTAGAACTCAC     |
| hsa-miR-182-5p  | miR182-5p-F2  | GTTTGGCAATGGTAGAACTCA    |
| hsa-miR-183-5p  | miR183-5p-F1  | GCAGTATGGCACTGGTAGA      |
| hsa-miR-183-5p  | miR183-5p-F2  | GCAGTATGGCACTGGTAG       |
| hsa-miR-96-5p   | miR96-5p-F1   | CAGTTTGGCACTAGCACA       |
| hsa-miR-96-5p   | miR96-5p-F2   | GCAGTTTGGCACTAGCAC       |
| hsa-miR-96-3p   | miR96-3p-F2   | AATCATGTGCAGTGCCAATATG   |
| hsa-miR-144-5p  | miR144-5p-F1  | GCGCAGGGATATCATCATATAC   |
| hsa-miR-144-5p  | miR144-5p-F2  | CGCAGGGATATCATCATATACTGT |
| hsa-miR-451     | miR451-F1     | CGCAGAAACCGTTACCA        |
| hsa-miR-4732-5p | miR4732-5p-F1 | TGTAGAGCAGGGAGCAG        |
| hsa-miR-4732-5p | miR4732-5p-F2 | GTGTAGAGCAGGGAGCA        |
| hsa-miR-4732-3p | miR4732-3p-F1 | CCCTGACCTGTCCTGT         |
| hsa-miR-4732-3p | miR4732-3p-F2 | GCCCTGACCTGTCCTG         |
| hsa-miR-486-3p  | miR486-3p-F1  | GGGGCAGCTCAGTACA         |
| hsa-miR-486-3p  | miR486-3p-F2  | GGGGCAGCTCAGTACAG        |
| hsa-miR-486-5p  | miR486-5p-F1  | GCAGTCCTGTACTGAGCTG      |
| hsa-miR-486-5p  | miR486-5p-F2  | CGCAGTCCTGTACTGAG        |
| hsa-miR-496     | miR496-F1     | CAGTGAGTATTACATGGCCAA    |
| hsa-miR-496     | miR496-F2     | GCGCAGTGAGTATTACATGG     |
| hsa-miR-215-5p  | miR215-5p-F1  | CGCAGATGACCTATGAATTGA    |
| hsa-miR-215-5p  | miR215-5p-F2  | GCAGATGACCTATGAATTGACA   |
| hsa-miR-215-3p  | miR215-3p-F1  | CGCAGTCTGTCATTTCTTTAGG   |
| hsa-miR-215-3p  | miR215-3p-F2  | CGCAGTCTGTCATTTCTTTAG    |
| hsa-miR-4306    | miR4306-F1    | CGCAGTGGAGAGAAAGG        |
| hsa-miR-4306    | miR4306-F2    | GCAGTGGAGAGAAAGGC        |

**Table S2.** miRNAs with significant differential expression during erythropoiesis ( $\log_2FC > -2$  or  $< 2$ ,  $p < 0.01$ ). (PID3 denotes the cells from the Phase I Day 3 of the culture and PIID9, PIID11, and PIID14 denote the cells from Day 9, Day 11, and Day 14 of the Phase II of the culture, respectively. The fold changes in PIID11 and PIID14 that were considered to decide whether the miRNAs were upregulated or downregulated are underlined).

| miRNA           | Total reads | Log2FC        |                |                | Expression     |
|-----------------|-------------|---------------|----------------|----------------|----------------|
|                 |             | PID3 vs PIID9 | PID3 vs PIID11 | PID3 vs PIID14 |                |
| hsa-miR-495-3p  | 728         | -3.07         | -5.62          | -7.66          | Downregulation |
| hsa-miR-573     | 557         | -0.75         | -2.23          | -6.94          | Downregulation |
| hsa-miR-758-3p  | 322         | -2.63         | -7.07          | -6.37          | Downregulation |
| hsa-miR-485-3p  | 228         | -3.82         | -4.55          | -6.36          | Downregulation |
| hsa-miR-370-3p  | 8244        | -3.67         | -5.21          | -6.15          | Downregulation |
| hsa-miR-134-5p  | 1873        | -3.20         | -4.57          | -5.99          | Downregulation |
| hsa-miR-551b-5p | 386         | -5.17         | -5.42          | -5.58          | Downregulation |
| hsa-miR-4420    | 113         | -1.72         | -5.42          | -5.49          | Downregulation |
| hsa-miR-433-3p  | 467         | -3.72         | -5.82          | -5.44          | Downregulation |
| hsa-miR-543     | 3293        | -4.52         | -7.59          | -5.36          | Downregulation |
| hsa-miR-1910-5p | 232         | -4.03         | -5.98          | -5.31          | Downregulation |
| hsa-miR-4425    | 520         | -2.63         | -3.34          | -5.30          | Downregulation |
| hsa-miR-412-5p  | 158         | -3.53         | -5.41          | -5.29          | Downregulation |
| hsa-miR-493-5p  | 3908        | -3.39         | -5.22          | -5.15          | Downregulation |

|                   |        |       |       |       |                |
|-------------------|--------|-------|-------|-------|----------------|
| hsa-miR-411-3p    | 273    | -4.20 | -7.30 | -5.15 | Downregulation |
| hsa-miR-1185-1-3p | 138    | -4.68 | -2.77 | 5.12  | Downregulation |
| hsa-miR-136-3p    | 184    | -2.43 | -3.65 | -5.10 | Downregulation |
| hsa-miR-493-3p    | 2876   | -2.95 | -4.95 | -4.98 | Downregulation |
| hsa-miR-379-3p    | 231    | -4.06 | -7.06 | -4.90 | Downregulation |
| hsa-miR-382-3p    | 146    | -2.81 | -6.34 | -4.88 | Downregulation |
| hsa-miR-301b-5p   | 240    | -2.80 | -5.60 | -4.79 | Downregulation |
| hsa-miR-345-3p    | 209    | -0.86 | -1.33 | -4.75 | Downregulation |
| hsa-miR-889-3p    | 510    | -2.69 | -3.13 | -4.69 | Downregulation |
| hsa-miR-369-5p    | 197    | -3.02 | -4.37 | -4.67 | Downregulation |
| hsa-miR-133a-5p   | 118    | -4.18 | -4.35 | -4.65 | Downregulation |
| hsa-miR-654-3p    | 1477   | -3.59 | -5.45 | -4.58 | Downregulation |
| hsa-miR-381-3p    | 6143   | -2.51 | -3.76 | -4.51 | Downregulation |
| hsa-miR-432-5p    | 739    | -2.52 | -3.45 | -4.49 | Downregulation |
| hsa-miR-127-3p    | 10875  | -2.68 | -4.08 | -4.49 | Downregulation |
| hsa-miR-485-5p    | 243    | -2.07 | -4.26 | -4.48 | Downregulation |
| hsa-miR-2115-3p   | 432    | -2.50 | -3.64 | -4.36 | Downregulation |
| hsa-miR-1914-5p   | 252    | -0.65 | -2.55 | -4.35 | Downregulation |
| hsa-miR-411-5p    | 1604   | -2.52 | -4.15 | -4.29 | Downregulation |
| hsa-miR-431-5p    | 186    | -2.77 | -3.36 | -4.27 | Downregulation |
| hsa-miR-409-3p    | 6051   | -3.06 | -5.10 | -4.26 | Downregulation |
| hsa-let-7c-3p     | 610    | -1.54 | -3.04 | -4.22 | Downregulation |
| hsa-miR-760       | 1085   | -0.46 | -1.57 | -4.13 | Downregulation |
| hsa-miR-222-5p    | 603    | -3.91 | -3.76 | -4.10 | Downregulation |
| hsa-miR-181b-3p   | 5124   | -2.23 | -3.48 | -4.09 | Downregulation |
| hsa-miR-654-5p    | 462    | -1.69 | -4.18 | -4.07 | Downregulation |
| hsa-miR-155-5p    | 851198 | -3.11 | -3.75 | -4.03 | Downregulation |
| hsa-miR-1250-5p   | 316    | -3.31 | -3.98 | -4.02 | Downregulation |
| hsa-miR-196a-5p   | 22557  | -2.66 | -3.48 | -4.00 | Downregulation |
| hsa-miR-455-5p    | 167    | -2.83 | -4.61 | -3.97 | Downregulation |
| hsa-miR-196b-5p   | 36664  | -2.69 | -3.36 | -3.94 | Downregulation |
| hsa-miR-3154      | 215    | -0.57 | -2.97 | -3.88 | Downregulation |
| hsa-miR-382-5p    | 1636   | -2.64 | -3.22 | -3.87 | Downregulation |
| hsa-miR-551a      | 230    | -2.48 | -3.40 | -3.83 | Downregulation |
| hsa-miR-1908-3p   | 893    | -0.06 | -1.22 | -3.79 | Downregulation |
| hsa-miR-124-5p    | 223    | -2.95 | -3.33 | -3.76 | Downregulation |
| hsa-miR-7111-3p   | 267    | -0.83 | -1.50 | -3.73 | Downregulation |
| hsa-miR-494-3p    | 1199   | -2.62 | -3.17 | -3.73 | Downregulation |
| hsa-miR-323a-3p   | 552    | -3.84 | -5.63 | -3.71 | Downregulation |
| hsa-miR-487b-3p   | 198    | -2.32 | -3.27 | -3.68 | Downregulation |
| hsa-miR-4741      | 471    | -2.18 | -2.66 | -3.66 | Downregulation |
| hsa-miR-1-3p      | 44708  | -3.83 | -5.01 | -3.57 | Downregulation |

|                   |        |       |       |       |                |
|-------------------|--------|-------|-------|-------|----------------|
| hsa-miR-379-5p    | 9237   | -2.09 | -3.48 | -3.57 | Downregulation |
| hsa-miR-4802-3p   | 149    | -3.40 | -2.53 | -3.56 | Downregulation |
| hsa-miR-143-3p    | 30699  | -2.78 | -3.81 | -3.54 | Downregulation |
| hsa-miR-1257      | 732    | 0.57  | -0.42 | -3.54 | Downregulation |
| hsa-miR-1271-5p   | 1643   | -2.44 | -3.11 | -3.54 | Downregulation |
| hsa-miR-222-3p    | 51917  | -2.88 | -3.04 | -3.51 | Downregulation |
| hsa-miR-133a-3p   | 259    | -2.37 | -2.57 | -3.49 | Downregulation |
| hsa-miR-877-3p    | 1730   | -0.30 | -1.41 | -3.48 | Downregulation |
| hsa-miR-181a-3p   | 26090  | -2.20 | -3.19 | -3.46 | Downregulation |
| hsa-miR-329-3p    | 297    | -3.40 | -4.72 | -3.42 | Downregulation |
| hsa-miR-145-3p    | 541    | -3.43 | -3.44 | -3.42 | Downregulation |
| hsa-miR-7974      | 41041  | -0.14 | -1.45 | -3.42 | Downregulation |
| hsa-miR-335-3p    | 18722  | -1.48 | -3.03 | -3.38 | Downregulation |
| hsa-miR-181c-5p   | 1189   | -2.88 | -3.24 | -3.38 | Downregulation |
| hsa-miR-99b-3p    | 26482  | -2.33 | -3.48 | -3.35 | Downregulation |
| hsa-miR-3679-5p   | 399    | -0.85 | -1.57 | -3.34 | Downregulation |
| hsa-miR-149-5p    | 1900   | -1.58 | -2.45 | -3.30 | Downregulation |
| hsa-miR-181b-2-3p | 1396   | -1.46 | -2.50 | -3.29 | Downregulation |
| hsa-miR-330-3p    | 19788  | -1.35 | -1.74 | -3.28 | Downregulation |
| hsa-miR-130a-5p   | 134    | -0.11 | -1.23 | -3.21 | Downregulation |
| hsa-miR-1226-5p   | 329    | 0.47  | -0.44 | -3.20 | Downregulation |
| hsa-miR-145-5p    | 430    | -1.47 | -2.61 | -3.17 | Downregulation |
| hsa-miR-582-3p    | 2197   | -1.88 | -2.95 | -3.10 | Downregulation |
| hsa-miR-598-5p    | 511    | -0.69 | -1.18 | -3.06 | Downregulation |
| hsa-miR-181d-3p   | 113    | -3.43 | -3.26 | -3.01 | Downregulation |
| hsa-miR-6503-3p   | 753    | -1.10 | -2.44 | -2.99 | Downregulation |
| hsa-miR-6718-5p   | 3266   | -1.82 | -2.42 | -2.96 | Downregulation |
| hsa-miR-10523-5p  | 175    | -0.18 | -1.94 | -2.96 | Downregulation |
| hsa-miR-191-3p    | 13220  | -0.53 | -1.54 | -2.94 | Downregulation |
| hsa-miR-125b-1-3p | 302    | -1.44 | -3.23 | -2.89 | Downregulation |
| hsa-miR-92a-1-5p  | 61853  | -0.49 | -0.96 | -2.88 | Downregulation |
| hsa-miR-296-3p    | 8777   | 0.06  | -0.84 | -2.85 | Downregulation |
| hsa-miR-181c-3p   | 3106   | -1.89 | -2.17 | -2.84 | Downregulation |
| hsa-miR-128-1-5p  | 4476   | -0.74 | -0.97 | -2.84 | Downregulation |
| hsa-miR-338-5p    | 2296   | -2.35 | -2.58 | -2.82 | Downregulation |
| hsa-miR-1909-3p   | 119    | -1.83 | -1.98 | -2.79 | Downregulation |
| hsa-miR-6763-5p   | 125    | -0.85 | -1.07 | -2.76 | Downregulation |
| hsa-miR-4502      | 210    | -0.23 | -1.70 | -2.75 | Downregulation |
| hsa-miR-146a-5p   | 856420 | -1.88 | -2.26 | -2.74 | Downregulation |
| hsa-miR-409-5p    | 216    | -3.67 | -5.25 | -2.74 | Downregulation |
| hsa-miR-26a-1-3p  | 503    | -1.24 | -1.59 | -2.72 | Downregulation |
| hsa-miR-4645-3p   | 137    | -1.41 | -2.76 | -2.70 | Downregulation |



|                  |        |       |       |       |                |
|------------------|--------|-------|-------|-------|----------------|
| hsa-miR-1273h-3p | 7934   | -1.60 | -2.55 | -2.69 | Downregulation |
| hsa-miR-1237-3p  | 368    | 0.14  | -0.49 | -2.68 | Downregulation |
| hsa-miR-5004-3p  | 147    | -1.05 | -1.86 | -2.65 | Downregulation |
| hsa-miR-6738-3p  | 219    | -1.64 | -1.87 | -2.65 | Downregulation |
| hsa-miR-1270     | 259    | -3.25 | -3.12 | -2.62 | Downregulation |
| hsa-miR-345-5p   | 60850  | -0.87 | -1.41 | -2.57 | Downregulation |
| hsa-miR-221-3p   | 569114 | -2.21 | -2.33 | -2.53 | Downregulation |
| hsa-miR-1275     | 31115  | 0.63  | -0.64 | -2.53 | Downregulation |
| hsa-miR-130b-5p  | 52347  | -2.35 | -3.62 | -2.53 | Downregulation |
| hsa-miR-3690     | 528    | -1.77 | -3.11 | -2.50 | Downregulation |
| hsa-miR-125a-3p  | 5647   | -1.08 | -2.12 | -2.45 | Downregulation |
| hsa-miR-338-3p   | 163    | -1.79 | -3.07 | -2.43 | Downregulation |
| hsa-miR-148a-5p  | 52303  | -0.61 | -1.70 | -2.42 | Downregulation |
| hsa-miR-10a-3p   | 9117   | -1.89 | -2.31 | -2.41 | Downregulation |
| hsa-miR-766-3p   | 4958   | -0.17 | -0.76 | -2.39 | Downregulation |
| hsa-miR-378g     | 15675  | -1.20 | -1.47 | -2.38 | Downregulation |
| hsa-miR-766-5p   | 844    | -1.88 | -2.50 | -2.37 | Downregulation |
| hsa-miR-1292-5p  | 1803   | -0.78 | -1.11 | -2.36 | Downregulation |
| hsa-miR-5001-5p  | 326    | -0.26 | -0.42 | -2.33 | Downregulation |
| hsa-miR-4695-3p  | 324    | -2.15 | -1.88 | -2.28 | Downregulation |
| hsa-miR-4510     | 451    | -3.12 | -2.87 | -2.27 | Downregulation |
| hsa-miR-326      | 3323   | -0.63 | -1.46 | -2.26 | Downregulation |
| hsa-miR-146b-3p  | 48403  | -1.57 | -1.98 | -2.24 | Downregulation |
| hsa-miR-6789-3p  | 477    | -1.20 | -1.64 | -2.23 | Downregulation |
| hsa-miR-3940-5p  | 448    | 0.14  | -0.28 | -2.21 | Downregulation |
| hsa-miR-3662     | 2472   | 0.21  | -1.30 | -2.21 | Downregulation |
| hsa-miR-937-3p   | 815    | -1.69 | -2.21 | -2.21 | Downregulation |
| hsa-miR-503-3p   | 301    | 0.94  | -0.93 | -2.21 | Downregulation |
| hsa-miR-152-5p   | 348    | 0.31  | -0.12 | -2.21 | Downregulation |
| hsa-miR-323b-3p  | 295    | -2.12 | -3.35 | -2.20 | Downregulation |
| hsa-miR-1249-3p  | 2980   | 1.03  | 0.94  | -2.19 | Downregulation |
| hsa-miR-4745-5p  | 340    | -0.21 | -1.02 | -2.15 | Downregulation |
| hsa-miR-195-3p   | 310    | -0.99 | -2.64 | -2.13 | Downregulation |
| hsa-miR-629-3p   | 670    | 0.01  | -0.03 | -2.13 | Downregulation |
| hsa-miR-221-5p   | 8176   | -2.09 | -2.29 | -2.10 | Downregulation |
| hsa-miR-4455     | 22286  | 0.39  | -1.63 | -2.05 | Downregulation |
| hsa-miR-301b-3p  | 716    | -0.91 | -1.55 | -2.04 | Downregulation |
| hsa-miR-671-5p   | 16179  | 0.70  | 0.41  | -2.04 | Downregulation |
| hsa-miR-136-5p   | 125    | -1.45 | -2.15 | -2.03 | Downregulation |
| hsa-miR-500b-3p  | 1239   | 0.47  | -0.54 | -2.02 | Downregulation |
| hsa-miR-200c-3p  | 27935  | -1.37 | -1.62 | -2.02 | Downregulation |
| hsa-miR-3620-3p  | 264    | 1.55  | 1.10  | -2.01 | Downregulation |

|                  |         |       |       |       |                |
|------------------|---------|-------|-------|-------|----------------|
| hsa-miR-1273h-5p | 1087    | -1.60 | -2.74 | -2.01 | Downregulation |
| hsa-miR-6798-3p  | 558     | -0.24 | -0.64 | -2.01 | Downregulation |
| hsa-miR-223-5p   | 145994  | -1.46 | -2.59 | -1.99 | Downregulation |
| hsa-let-7e-3p    | 1147    | -1.89 | -2.89 | -1.99 | Downregulation |
| hsa-miR-4707-5p  | 1125    | 0.40  | -0.46 | -2.04 | Downregulation |
| hsa-miR-877-5p   | 6415    | 1.42  | 1.03  | -2.03 | Downregulation |
| hsa-miR-181b-5p  | 278184  | -1.52 | -1.29 | -1.99 | Downregulation |
| hsa-miR-1226-3p  | 2996    | -1.33 | -1.50 | -2.09 | Downregulation |
| hsa-miR-199b-5p  | 76015   | -1.18 | -2.00 | -1.90 | Downregulation |
| hsa-miR-301a-5p  | 6659    | -0.78 | -1.54 | -2.09 | Downregulation |
| hsa-miR-4665-5p  | 292     | -0.98 | -1.17 | -2.09 | Downregulation |
| hsa-miR-4687-3p  | 496     | 0.55  | 0.17  | -2.11 | Downregulation |
| hsa-miR-181d-5p  | 179291  | -1.50 | -1.21 | -2.10 | Downregulation |
| hsa-miR-200a-5p  | 251     | -0.94 | -2.10 | -1.82 | Downregulation |
| hsa-miR-11400    | 499     | -0.95 | -2.47 | -1.82 | Downregulation |
| hsa-miR-200b-5p  | 134     | -2.82 | -1.60 | -2.02 | Downregulation |
| hsa-miR-29b-1-5p | 602     | -2.27 | -1.63 | -2.01 | Downregulation |
| hsa-miR-3911     | 110     | -0.65 | -2.67 | -1.77 | Downregulation |
| hsa-miR-146b-5p  | 6174725 | -1.41 | -2.00 | -1.73 | Downregulation |
| hsa-miR-7-5p     | 1839411 | -1.22 | -2.00 | -1.67 | Downregulation |
| hsa-miR-6787-3p  | 277     | -1.47 | -2.27 | -1.65 | Downregulation |
| hsa-miR-340-3p   | 83436   | -0.93 | -2.01 | -1.51 | Downregulation |
| hsa-miR-605-3p   | 205     | -1.64 | -2.12 | -1.44 | Downregulation |
| hsa-miR-99b-5p   | 358485  | -1.44 | -2.32 | -1.43 | Downregulation |
| hsa-miR-369-3p   | 282     | -1.67 | -3.62 | -1.34 | Downregulation |
| hsa-miR-3174     | 494     | -1.26 | -2.06 | -1.29 | Downregulation |
| hsa-miR-3934-5p  | 321     | -0.86 | -2.08 | -1.24 | Downregulation |
| hsa-miR-9-5p     | 1819    | -1.72 | -2.00 | -1.22 | Downregulation |
| hsa-miR-3614-5p  | 501     | -1.28 | -2.02 | -1.19 | Downregulation |
| hsa-miR-95-3p    | 129     | -2.07 | -2.35 | -1.13 | Downregulation |
| hsa-miR-100-5p   | 65413   | -1.58 | -2.00 | -1.12 | Downregulation |
| hsa-miR-10a-5p   | 810721  | -2.10 | -2.88 | -1.04 | Downregulation |
| hsa-miR-10b-5p   | 566070  | -2.13 | -2.95 | -0.93 | Downregulation |
| hsa-miR-3681-5p  | 125     | -1.88 | -2.17 | -0.91 | Downregulation |
| hsa-miR-210-5p   | 529     | 1.59  | 2.31  | -0.67 | Upregulation   |
| hsa-miR-4443     | 4504    | -1.19 | -2.08 | -0.67 | Downregulation |
| hsa-miR-98-3p    | 537     | -0.94 | -2.03 | -0.66 | Downregulation |
| hsa-miR-33b-3p   | 8370    | 2.21  | 2.02  | -0.63 | Upregulation   |
| hsa-miR-212-5p   | 511     | -1.28 | -2.18 | -0.54 | Downregulation |
| hsa-miR-3667-5p  | 599     | 2.13  | 2.61  | 0.41  | Upregulation   |
| hsa-miR-4516     | 209     | 0.67  | 2.00  | 0.58  | Upregulation   |
| hsa-miR-664b-5p  | 162     | 1.03  | 2.02  | 0.63  | Upregulation   |

|                  |         |       |      |      |              |
|------------------|---------|-------|------|------|--------------|
| hsa-miR-4646-3p  | 267     | 2.11  | 2.00 | 0.86 | Upregulation |
| hsa-miR-193b-3p  | 445     | 2.83  | 2.36 | 0.99 | Upregulation |
| hsa-miR-193b-5p  | 275     | 1.79  | 2.27 | 1.18 | Upregulation |
| hsa-miR-185-3p   | 31052   | 1.53  | 2.31 | 1.26 | Upregulation |
| hsa-miR-6749-3p  | 322     | 2.80  | 3.35 | 1.37 | Upregulation |
| hsa-miR-532-3p   | 9012    | 2.02  | 2.55 | 1.41 | Upregulation |
| hsa-miR-362-5p   | 28304   | 2.01  | 2.87 | 1.53 | Upregulation |
| hsa-miR-501-5p   | 1069    | 1.85  | 3.03 | 1.55 | Upregulation |
| hsa-miR-636      | 351     | 1.68  | 2.01 | 1.56 | Upregulation |
| hsa-miR-6777-3p  | 1561    | 3.60  | 3.76 | 1.57 | Upregulation |
| hsa-miR-124-3p   | 508     | 2.13  | 2.32 | 1.63 | Upregulation |
| hsa-miR-660-5p   | 23151   | 1.09  | 1.98 | 1.66 | Upregulation |
| hsa-miR-3675-5p  | 183     | 1.51  | 1.89 | 1.66 | Upregulation |
| hsa-miR-501-3p   | 79632   | 1.28  | 1.95 | 1.66 | Upregulation |
| hsa-miR-339-5p   | 48507   | 1.16  | 2.07 | 1.68 | Upregulation |
| hsa-miR-6833-3p  | 411     | 1.51  | 1.83 | 1.69 | Upregulation |
| hsa-miR-10395-3p | 3625    | 0.48  | 1.00 | 1.70 | Upregulation |
| hsa-miR-6505-5p  | 722     | 1.73  | 2.15 | 1.73 | Upregulation |
| hsa-miR-627-5p   | 642     | 1.36  | 2.40 | 1.79 | Upregulation |
| hsa-miR-1294     | 8246    | 1.45  | 2.04 | 1.82 | Upregulation |
| hsa-miR-218-5p   | 163     | 0.85  | 1.24 | 2.03 | Upregulation |
| hsa-miR-374a-5p  | 45420   | 0.31  | 0.07 | 2.02 | Upregulation |
| hsa-miR-12136    | 23673   | 2.11  | 3.77 | 1.87 | Upregulation |
| hsa-miR-106b-5p  | 163431  | 0.71  | 1.90 | 2.01 | Upregulation |
| hsa-miR-15b-3p   | 19377   | 0.16  | 0.57 | 2.00 | Upregulation |
| hsa-miR-301a-3p  | 421     | -0.42 | 0.56 | 2.09 | Upregulation |
| hsa-miR-29b-3p   | 11163   | 0.58  | 0.83 | 2.01 | Upregulation |
| hsa-miR-532-5p   | 482221  | 1.38  | 1.43 | 2.00 | Upregulation |
| hsa-miR-22-5p    | 12121   | 0.79  | 1.63 | 2.16 | Upregulation |
| hsa-miR-3942-5p  | 216     | 1.52  | 1.98 | 2.00 | Upregulation |
| hsa-miR-16-2-3p  | 226820  | 0.08  | 0.54 | 2.01 | Upregulation |
| hsa-miR-30b-5p   | 21445   | 0.64  | 0.68 | 2.01 | Upregulation |
| hsa-miR-513a-5p  | 260     | 3.22  | 2.58 | 2.05 | Upregulation |
| hsa-miR-10400-5p | 547     | 0.49  | 1.89 | 2.05 | Upregulation |
| hsa-miR-1278     | 4375    | 0.56  | 0.20 | 2.05 | Upregulation |
| hsa-miR-5189-5p  | 471     | 1.86  | 1.95 | 2.06 | Upregulation |
| hsa-miR-324-5p   | 2974    | 1.50  | 2.09 | 2.07 | Upregulation |
| hsa-miR-548am-5p | 109     | 0.67  | 1.59 | 2.07 | Upregulation |
| hsa-miR-4659b-3p | 453     | 2.34  | 2.16 | 2.07 | Upregulation |
| hsa-miR-5091     | 559     | 1.57  | 1.23 | 2.08 | Upregulation |
| hsa-miR-151a-3p  | 1028070 | 1.45  | 1.14 | 2.08 | Upregulation |
| hsa-miR-4485-3p  | 695     | 0.54  | 1.73 | 2.09 | Upregulation |

|                   |         |       |      |      |              |
|-------------------|---------|-------|------|------|--------------|
| hsa-miR-1246      | 987001  | -0.21 | 1.94 | 2.09 | Upregulation |
| hsa-miR-610       | 332     | 1.28  | 2.04 | 2.13 | Upregulation |
| hsa-miR-4651      | 105     | 2.04  | 3.78 | 2.14 | Upregulation |
| hsa-miR-550a-3p   | 725     | 2.16  | 2.65 | 2.16 | Upregulation |
| hsa-miR-33a-3p    | 233     | 0.84  | 1.90 | 2.16 | Upregulation |
| hsa-miR-6513-3p   | 696     | 0.78  | 1.26 | 2.17 | Upregulation |
| hsa-miR-625-5p    | 5491    | 0.86  | 2.01 | 2.18 | Upregulation |
| hsa-miR-4999-5p   | 327     | 0.40  | 1.42 | 2.18 | Upregulation |
| hsa-miR-590-5p    | 133     | 2.79  | 3.78 | 2.19 | Upregulation |
| hsa-miR-500a-5p   | 804     | 1.76  | 3.30 | 2.20 | Upregulation |
| hsa-miR-548bc     | 8100    | 1.87  | 1.52 | 2.25 | Upregulation |
| hsa-miR-4488      | 1494    | 0.48  | 1.22 | 2.27 | Upregulation |
| hsa-miR-3136-5p   | 172     | 0.71  | 1.71 | 2.28 | Upregulation |
| hsa-miR-548at-5p  | 295     | 0.83  | 2.16 | 2.29 | Upregulation |
| hsa-miR-454-3p    | 11839   | 0.32  | 2.15 | 2.29 | Upregulation |
| hsa-miR-185-5p    | 4525309 | 2.29  | 2.68 | 2.30 | Upregulation |
| hsa-miR-483-5p    | 127     | 2.72  | 5.56 | 2.30 | Upregulation |
| hsa-miR-4449      | 361     | -0.30 | 2.87 | 2.30 | Upregulation |
| hsa-miR-616-5p    | 221     | 0.03  | 0.63 | 2.30 | Upregulation |
| hsa-miR-6734-5p   | 518     | 2.60  | 3.77 | 2.30 | Upregulation |
| hsa-miR-550a-3-5p | 13173   | 1.37  | 1.54 | 2.31 | Upregulation |
| hsa-miR-502-3p    | 62502   | 1.57  | 2.49 | 2.35 | Upregulation |
| hsa-miR-5010-5p   | 412     | 1.88  | 2.80 | 2.36 | Upregulation |
| hsa-miR-1290      | 219319  | -0.13 | 2.11 | 2.37 | Upregulation |
| hsa-miR-29c-3p    | 3840    | 0.58  | 1.20 | 2.39 | Upregulation |
| hsa-miR-151b      | 642     | 1.89  | 2.08 | 2.40 | Upregulation |
| hsa-miR-3190-3p   | 327     | 1.53  | 1.59 | 2.41 | Upregulation |
| hsa-miR-3158-3p   | 13212   | 1.50  | 1.71 | 2.43 | Upregulation |
| hsa-miR-15b-5p    | 68481   | 0.63  | 1.84 | 2.44 | Upregulation |
| hsa-miR-3912-3p   | 521     | 1.51  | 1.14 | 2.44 | Upregulation |
| hsa-miR-4301      | 1568    | 0.29  | 2.12 | 2.48 | Upregulation |
| hsa-miR-6859-5p   | 269     | -0.63 | 0.33 | 2.52 | Upregulation |
| hsa-miR-502-5p    | 268     | 1.61  | 3.23 | 2.52 | Upregulation |
| hsa-miR-4672      | 202     | 2.51  | 3.35 | 2.52 | Upregulation |
| hsa-miR-548d-5p   | 9797    | 0.80  | 1.99 | 2.53 | Upregulation |
| hsa-miR-3135a     | 509     | 1.31  | 1.71 | 2.54 | Upregulation |
| hsa-miR-4511      | 591     | 1.84  | 2.53 | 2.56 | Upregulation |
| hsa-miR-5690      | 359     | 1.25  | 0.99 | 2.60 | Upregulation |
| hsa-miR-1255b-5p  | 2092    | 1.74  | 1.97 | 2.61 | Upregulation |
| hsa-miR-34a-5p    | 6653    | 1.89  | 3.11 | 2.62 | Upregulation |
| hsa-miR-4791      | 3836    | 0.01  | 1.25 | 2.67 | Upregulation |
| hsa-miR-339-3p    | 99074   | 1.85  | 2.89 | 2.76 | Upregulation |

|                  |         |      |      |      |              |
|------------------|---------|------|------|------|--------------|
| hsa-miR-5695     | 231     | 0.57 | 1.71 | 2.76 | Upregulation |
| hsa-miR-660-3p   | 178     | 1.65 | 1.74 | 2.79 | Upregulation |
| hsa-miR-140-3p   | 305591  | 0.77 | 2.16 | 2.80 | Upregulation |
| hsa-miR-6505-3p  | 390     | 1.90 | 1.28 | 2.80 | Upregulation |
| hsa-miR-362-3p   | 185     | 0.70 | 1.67 | 2.81 | Upregulation |
| hsa-miR-3613-3p  | 524     | 2.21 | 3.06 | 2.87 | Upregulation |
| hsa-miR-6741-5p  | 203     | 1.55 | 2.29 | 2.89 | Upregulation |
| hsa-miR-210-3p   | 9610    | 2.23 | 3.35 | 2.95 | Upregulation |
| hsa-miR-6777-5p  | 235     | 4.45 | 5.27 | 3.03 | Upregulation |
| hsa-miR-548ay-5p | 8349    | 0.97 | 2.42 | 3.03 | Upregulation |
| hsa-miR-935      | 585     | 2.97 | 3.01 | 3.05 | Upregulation |
| hsa-miR-4497     | 1538    | 0.41 | 1.92 | 3.05 | Upregulation |
| hsa-miR-151a-5p  | 17308   | 2.19 | 3.05 | 3.06 | Upregulation |
| hsa-miR-4637     | 141     | 1.50 | 2.57 | 3.06 | Upregulation |
| hsa-miR-22-3p    | 242867  | 0.41 | 1.61 | 3.06 | Upregulation |
| hsa-miR-4508     | 111     | 0.50 | 1.68 | 3.07 | Upregulation |
| hsa-miR-16-5p    | 316601  | 0.69 | 2.15 | 3.08 | Upregulation |
| hsa-miR-1248     | 1328    | 0.46 | 1.86 | 3.12 | Upregulation |
| hsa-miR-101-3p   | 1280346 | 1.43 | 1.97 | 3.13 | Upregulation |
| hsa-miR-3611     | 349     | 1.01 | 1.95 | 3.13 | Upregulation |
| hsa-miR-182-3p   | 336     | 3.40 | 3.56 | 3.14 | Upregulation |
| hsa-miR-548c-5p  | 5641    | 0.92 | 2.40 | 3.15 | Upregulation |
| hsa-miR-584-3p   | 368     | 3.45 | 4.05 | 3.17 | Upregulation |
| hsa-miR-548b-5p  | 6127    | 1.07 | 2.55 | 3.18 | Upregulation |
| hsa-miR-4286     | 3349    | 2.51 | 3.58 | 3.28 | Upregulation |
| hsa-miR-202-5p   | 234     | 2.14 | 2.97 | 3.29 | Upregulation |
| hsa-miR-486-3p   | 149729  | 2.16 | 1.72 | 3.44 | Upregulation |
| hsa-miR-4669     | 226     | 2.74 | 2.62 | 3.46 | Upregulation |
| hsa-miR-3688-3p  | 1291    | 0.60 | 1.77 | 3.48 | Upregulation |
| hsa-miR-548ab    | 5103    | 0.88 | 2.60 | 3.49 | Upregulation |
| hsa-miR-624-5p   | 1183    | 1.63 | 2.67 | 3.52 | Upregulation |
| hsa-miR-548ac    | 140     | 0.70 | 1.47 | 3.64 | Upregulation |
| hsa-miR-15a-5p   | 17651   | 0.71 | 2.17 | 3.68 | Upregulation |
| hsa-miR-548an    | 146     | 0.31 | 2.82 | 3.73 | Upregulation |
| hsa-miR-3163     | 241     | 1.40 | 2.39 | 3.85 | Upregulation |
| hsa-miR-194-5p   | 105392  | 1.84 | 3.54 | 3.86 | Upregulation |
| hsa-miR-584-5p   | 126118  | 3.74 | 4.13 | 3.88 | Upregulation |
| hsa-miR-192-5p   | 298807  | 2.05 | 2.80 | 3.91 | Upregulation |
| hsa-miR-548au-5p | 4141    | 0.86 | 2.90 | 4.02 | Upregulation |
| hsa-miR-548ad-5p | 5282    | 0.92 | 3.01 | 4.08 | Upregulation |
| hsa-miR-215-5p   | 28646   | 2.05 | 2.78 | 4.26 | Upregulation |
| hsa-miR-3200-3p  | 423     | 3.44 | 4.49 | 4.34 | Upregulation |

|                 |         |      |      |       |              |
|-----------------|---------|------|------|-------|--------------|
| hsa-miR-4448    | 9924    | 2.22 | 3.29 | 4.37  | Upregulation |
| hsa-miR-3135b   | 17279   | 2.35 | 2.37 | 4.42  | Upregulation |
| hsa-miR-7976    | 2166    | 2.30 | 3.71 | 4.91  | Upregulation |
| hsa-miR-4503    | 137     | 2.32 | 4.65 | 5.08  | Upregulation |
| hsa-miR-486-5p  | 7025604 | 3.44 | 4.45 | 5.08  | Upregulation |
| hsa-miR-183-3p  | 1725    | 5.04 | 6.34 | 5.26  | Upregulation |
| hsa-miR-144-5p  | 275363  | 4.64 | 5.61 | 5.56  | Upregulation |
| hsa-miR-96-5p   | 68467   | 5.04 | 5.70 | 6.10  | Upregulation |
| hsa-miR-190a-5p | 292     | 3.63 | 4.83 | 6.34  | Upregulation |
| hsa-miR-183-5p  | 435443  | 4.54 | 5.12 | 6.61  | Upregulation |
| hsa-miR-182-5p  | 975481  | 4.71 | 6.04 | 6.98  | Upregulation |
| hsa-miR-4732-5p | 697     | 4.92 | 6.94 | 7.00  | Upregulation |
| hsa-miR-375-3p  | 606     | 5.29 | 6.36 | 7.05  | Upregulation |
| hsa-miR-7155-3p | 175     | 1.36 | 5.20 | 7.16  | Upregulation |
| hsa-miR-483-3p  | 196     | 6.25 | 8.21 | 7.56  | Upregulation |
| hsa-miR-144-3p  | 270635  | 5.47 | 6.96 | 7.71  | Upregulation |
| hsa-miR-4732-3p | 1288    | 3.90 | 6.80 | 8.81  | Upregulation |
| hsa-miR-451a    | 669963  | 6.99 | 9.70 | 10.21 | Upregulation |

**Table S3.** Previously reported miRNAs involved in erythropoiesis identified in this study.

| miRNA            | Expression    | Reference        |
|------------------|---------------|------------------|
| hsa-mir-155-5p   | Downregulated | [9]              |
| hsa-mir-181a-3p  | Downregulated | [20]             |
| hsa-mir-222-3p   | Downregulated | [89,90]          |
| hsa-mir-10b-5p   | Downregulated | [91]             |
| hsa-mir-223-5p   | Downregulated | [92]             |
| hsa-mir-221-3p   | Downregulated | [89,90]          |
| hsa-mir-146a-5p  | Downregulated | [9]              |
| hsa-mir-19b-1-5p | Downregulated | [93]             |
| hsa-mir-125a-3p  | Downregulated | [94]             |
| hsa-mir-146b-3p  | Downregulated | [95]             |
| hsa-mir-1255b-5p | Upregulated   | [96]             |
| hsa-mir-339-3p   | Upregulated   | [97]             |
| hsa-mir-210-3p   | Upregulated   | [98]             |
| hsa-mir-151a-5p  | Upregulated   | [99]             |
| hsa-mir-22-3p    | Upregulated   | [99,100]         |
| hsa-mir-16-5p    | Upregulated   | [93]             |
| hsa-mir-486-3p   | Upregulated   | [97,31]          |
| hsa-mir-144-5p   | Upregulated   | [101–103,67]     |
| hsa-mir-96-5p    | Upregulated   | [32,41,104]      |
| hsa-mir-451a     | Upregulated   | [22, 97,101,105] |

**Table S4.** Molecular functions and pathways of the upregulated genes targeted by multiple downregulated miRNAs.

| Genes   | Molecular Functions                                                                                                                                                                                                                                                         | Functions in eryth-<br>ropoiesis                         | Number of<br>miRNAs | miRNAs                                                                                                                                                                                             | References |
|---------|-----------------------------------------------------------------------------------------------------------------------------------------------------------------------------------------------------------------------------------------------------------------------------|----------------------------------------------------------|---------------------|----------------------------------------------------------------------------------------------------------------------------------------------------------------------------------------------------|------------|
| AGO2    | Required for RNA-mediated gene silencing (RNAi) by the RNA-induced silencing complex (RISC).                                                                                                                                                                                | Ago2 <sup>-/-</sup> mice lack fully functional red cells | 24                  | 125a-3p, 1275, 145-3p, 181b-3p, 195-3p, 221-3p, 222-3p, 223-5p, 329-3p, 3620-3p, 3690, 382-3p, 3934-5p, 3940-5p, 4420, 4510, 4665-5p, 495-3p, 605-3p, 654-5p, 671-5p, 6763-5p, 92a-1-5p, 181b-2-3p | [106]      |
| CDKN1B  | Regulator of cell cycle progression. Inhibits the kinase activity of CDK2 bound to cyclin A.                                                                                                                                                                                | Required for red cell differentiation and enucleation    | 16                  | 1185-1-3p, 148a-5p, 155-5p, 196a-5p, 196b-5p, 200c-3p, 221-3p, 221-5p, 222-3p, 323a-3p, 335-3p, 3679-5p, 455-5p, 6763-5p, 877-5p, 98-3p                                                            | [107]      |
| MKNK2   | Initiation of mRNA translation by phosphorylation of eIF4E                                                                                                                                                                                                                  | Not reported                                             | 15                  | 10a-5p, 10b-5p, 134-5p, 152-5p, 181b-2-3p, 181b-3p, 1910-5p, 200c-3p, 345-3p, 3911, 4420, 4510, 4645-3p, 4802-3p, 494-3p                                                                           |            |
| SLC7A5  | Import large neutral amino acids with branched or aromatic side chains                                                                                                                                                                                                      | Not reported                                             | 15                  | 10a-5p, 10b-5p, 134-5p, 152-5p, 181b-2-3p, 181b-3p, 1910-5p, 200c-3p, 345-3p, 3911, 4420, 4510, 4645-3p, 4802-3p, 494-3p                                                                           |            |
| TXNIP   | Inhibits the antioxidative function of thioredoxin resulting in the accumulation of reactive oxygen species and cellular stress                                                                                                                                             | Knock down affects erythroid differentiation             | 14                  | 130a-5p, 134-5p, 152-5p, 212-5p, 29b-1-5p, 301b-3p, 3154, 323a-3p, 3940-5p, 4443, 4687-3p, 495-3p, 573, 7974                                                                                       | [108]      |
| YOD1    | Deubiquitinase activity                                                                                                                                                                                                                                                     | Not reported                                             | 14                  | 10a-5p, 1237-3p, 1273h-3p, 196a-5p, 196b-5p, 2115-3p, 221-3p, 221-5p, 369-3p, 4455, 551b-5p, 6718-5p, 7-5p, 877-5p                                                                                 |            |
| VEGFA   | Growth factor active in angiogenesis, vasculogenesis, and endothelial cell growth.                                                                                                                                                                                          | Activates erythropoietin receptor                        | 13                  | 125a-3p, 133a-3p, 134-5p, 1-3p, 145-5p, 200c-3p, 329-3p, 330-3p, 3662, 369-3p, 495-3p, 598-5p, 9-5p                                                                                                |            |
| BCL2L11 | Induces apoptosis and anoikis                                                                                                                                                                                                                                               | Erythroid pro-survival factor                            | 12                  | 10a-5p, 10b-5p, 181b-5p, 200c-3p, 221-3p, 222-3p, 301b-3p, 4502, 4745-5p, 494-3p, 6718-5p, 9-5p                                                                                                    |            |
| CPEB4   | CPEB4 activates mRNA translation by adding poly(A) tails to target mRNAs. Regulates activation of unfolded protein response (UPR) in the process of adaptation to ER stress. Required for cell cycle progression, specifically for cytokinesis and chromosomal segregation. | Regulates erythroid differentiation                      | 11                  | 145-5p, 146b-3p, 155-5p, 181b-5p, 181c-5p, 181d-5p, 382-3p, 409-3p, 487b-3p, 573, 9-5p                                                                                                             | [109]      |
| TUBB2A  | The major constituent of microtubules.                                                                                                                                                                                                                                      | Erythroid tubulin regulated by GATA1 and heme            | 11                  | 1270, 143-3p, 181b-5p, 181c-5p, 181d-5p, 195-3p, 200c-3p, 369-3p, 432-5p, 4443, 4510                                                                                                               | [110]      |

|        |                                                                                                                                                                                                                                                                                                                                                                                                       |                                                                |    |                                                                                       |       |
|--------|-------------------------------------------------------------------------------------------------------------------------------------------------------------------------------------------------------------------------------------------------------------------------------------------------------------------------------------------------------------------------------------------------------|----------------------------------------------------------------|----|---------------------------------------------------------------------------------------|-------|
| DDIT4  | Regulates cell growth, proliferation, and survival via inhibition of mTORC1 by a pathway that involves DDIT4/REDD1, AKT1, the TSC1–TSC2 complex, and the GTPase RHEB. An important role in responses to cellular energy levels and cellular stress, including responses to hypoxia and DNA damage. Regulates p53/TP53-mediated apoptosis in response to DNA damage via its effect on mTORC1 activity. | Not reported                                                   | 10 | 181b-5p, 181c-5p, 181d-5p, 200c-3p, 2115-3p, 221-3p, 222-5p, 335-3p, 3934-5p, 495-3p  |       |
| MYLIP  | E3 ubiquitin-protein ligase that mediates ubiquitination and subsequent proteasomal degradation of myosin regulatory light chain (MRLC), LDLR, VLDLR, and LRP8. Activity depends on E2 enzymes of the UBE2D family.                                                                                                                                                                                   | Regulates erythroid differentiation                            | 10 | 221-3p, 222-3p, 301b-3p, 323a-3p, 369-3p, 382-3p, 455-5p, 4645-3p, 654-3p, 889-3p     | [111] |
| SLC1A5 | Sodium-dependent amino acids transporter                                                                                                                                                                                                                                                                                                                                                              | Required for erythroid lineage determination                   | 10 | 1226-3p, 125a-3p, 1273h-5p, 155-5p, 330-3p, 3934-5p, 3940-5p, 433-3p, 455-5p, 500b-3p | [112] |
| ZBTB7A | Transcription factor that represses the transcription of a wide range of genes involved in cell proliferation and differentiation. Involved in the switch between fetal and adult globin expression, differentiation of lymphoid progenitors into B and T lineages.                                                                                                                                   | Anti-apoptotic role during terminal erythroid differentiation. | 10 | 100-5p, 1185-1-3p, 222-3p, 296-3p, 301b-3p, 335-3p, 4443, 500b-3p, 654-5p, 877-3p     | [113] |

**Table S5.** Molecular functions and pathways of the downregulated genes targeted by multiple upregulated miRNAs.

| Genes | Molecular Functions                                                    | Functions in erythropoiesis                                 | Number of miRNAs | miRNAs                                                                                                                                              | References |
|-------|------------------------------------------------------------------------|-------------------------------------------------------------|------------------|-----------------------------------------------------------------------------------------------------------------------------------------------------|------------|
| CCND2 | Regulates cell-cycle during G (1)/S transition.                        | Controls erythrocyte cell number                            | 22               | 106b-5p,124-3p,1248,1255b-5p,15a-5p,15b-5p,16-5p,182-5p,185-5p,29b-3p,29c-3p,301a-3p,3163,33a-3p,3613-3p,4503,4516,454-3p,610,6505-5p,6859-5p,96-5p | [114]      |
| CDK6  | Regulates cell-cycle during G (1)/S transition.                        | Contributes to cytoskeletal stability in erythroid cells    | 19               | 124-3p,140-3p,15a-5p,15b-5p,16-5p,183-3p,185-5p,193b-3p,218-5p,22-3p,29b-3p,29c-3p,34a-5p,362-3p,501-3p,502-3p,5091,616-5p,624-5p                   | [115]      |
| RAB32 | Involved in synchronization of mitochondrial fission and phagocytosis. | Affects cell proliferation and apoptosis of erythroid cells | 17               | 124-3p,185-5p,193b-3p,3135b,339-5p,374a-5p,4646-3p,548ab,548ad-5p,548am-5p,548an,548au-5p,548ay-5p,548b-5p,548c-5p,548d-5p,6859-5p                  |            |



|         |                                                                                                                                                                                               |                                                              |    |                                                                                                               |       |
|---------|-----------------------------------------------------------------------------------------------------------------------------------------------------------------------------------------------|--------------------------------------------------------------|----|---------------------------------------------------------------------------------------------------------------|-------|
| ZNF154  | May be involved in transcriptional regulation                                                                                                                                                 | Not reported                                                 | 14 | 301a-3p,3135b,454-3p,5189-5p,548ab,548ad-5p,548am-5p,548au-5p,548ay-5p,548b-5p,548c-5p,548d-5p,550a-3-5p,5690 |       |
| KLF7    | Transcription factor with several functions in different cell types                                                                                                                           | Not reported                                                 | 14 | 3163,324-5p,4301,4516,501-5p,548ab,548ad-5p,548am-5p, 548au-5p,548ay-5p,548b-5p,548c-5p, 548d-5p,6505-3p      |       |
| UBE2D1  | E2 ubiquitin-conjugating enzyme involved in protein degradation through proteasome pathway                                                                                                    | Not reported                                                 | 13 | 192-5p,215-5p,33a-3p,513a-5p,548ab,548ac,548ad-5p,548am-5p,548au-5p,548ay-5p,548b-5p,548c-5p,548d-5p          |       |
| RBMS2   | Involved in DNA replication, gene transcription, cell cycle progression, and apoptosis.                                                                                                       | Not reported                                                 | 13 | 194-5p,548ab,548ad-5p,548am-5p,548an,548au-5p,548ay-5p,548b-5p,548c-5p,548d-5p,550a-3-5p,5690, 6741-5p        |       |
| HOXA10  | Transcription factor which is part of a developmental regulatory system                                                                                                                       | Blocks erythroid differentiation                             | 12 | 144-3p,15a-5p,15b-5p,16-2-3p,16-5p,192-5p,215-5p,3611,3688-3p, 3942-5p,4791,513a-5p                           | [116] |
| ZNF711  | Transcription regulator required for brain development.                                                                                                                                       | Not reported                                                 | 12 | 151a-3p,218-5p,301a-3p,454-3p,548ab,548ad-5p,548am-5p,548au-5p,548ay-5p,548b-5p,548c-5p,548d-5p               |       |
| BCL2    | Blocks the apoptotic death                                                                                                                                                                    | Overexpression delays the apoptosis of erythroid progenitors | 12 | 15a-5p,15b-5p,16-5p,182-5p,192-5p,215-5p,29b-3p,29c-3p,30b-5p,34a-5p,451a,96-5p                               | [117] |
| USP53   | Tight junction-associated protein that is involved in the survival of auditory hair cells and hearing. Maybe by modulating the barrier properties and mechanical stability of tight junctions | Not reported                                                 | 12 | 15a-5p,15b-5p,16-5p,30b-5p,548ab,548ad-5p,548am-5p,548au-5p,548ay-5p,548b-5p,548c-5p,548d-5p                  |       |
| SOX4    | Transcription factor with several functions in different cell types                                                                                                                           | Not reported                                                 | 11 | 106b-5p,151a-5p,185-3p,301a-3p,30b-5p,3163,3613-3p,4516,454-3p,548ac,6749-3p                                  |       |
| SULT1B1 | Catalyses the sulphate conjugation of many hormones, neurotransmitters, drugs, and xenobiotic compounds.                                                                                      | Not reported                                                 | 11 | 124-3p,16-2-3p,3135b,3163,3190-3p,339-5p,3611,4516,4646-3p, 616-5p,6859-5p                                    |       |
| GPR27   | intracellular signalling cascade mediated by heterotrimeric GTP-binding proteins, or G proteins                                                                                               | Not reported                                                 | 11 | 15a-5p,15b-5p,16-5p,548ab,548ad-5p,548am-5p,548au-5p,548ay-5p,548b-5p,548c-5p,548d-5p                         |       |
| CMTM6   | Regulates T cell activation and antitumor responses.                                                                                                                                          | Not reported                                                 | 10 | 101-3p,144-3p,16-2-3p,192-5p,215-5p,3136-5p,532-3p,548ac,660-3p,6749-3p,                                      |       |
| PRRG4   | May control axon guidance across the CNS. Prevents the delivery of ROBO1 at the cell surface and downregulates its expression                                                                 | Not reported                                                 | 10 | 106b-5p,1248,192-5p,301a-3p,362-5p,454-3p,4659b-3p,483-3p,500a-5p,660-3p                                      |       |
| WNK3    | Serine/threonine kinase that regulates electrolyte homeostasis, cell signaling, survival and proliferation. Acts as an                                                                        | Not reported                                                 | 10 | 106b-5p,151a-3p,15a-5p,15b-5p,16-5p,301a-3p,3613-3p,362-3p,454-3p,660-5p                                      |       |

|        |                                                                                                                                                                                                          |              |    |                                                                                    |
|--------|----------------------------------------------------------------------------------------------------------------------------------------------------------------------------------------------------------|--------------|----|------------------------------------------------------------------------------------|
|        | activator and inhibitor of sodium-coupled chloride cotransporters and potassium-coupled chloride cotransporters respectively                                                                             |              |    |                                                                                    |
| CBX2   | Component of a Polycomb group (PcG) multiprotein PRC1-like complex, a complex class required to maintain the transcriptionally repressive state of many genes                                            | Not reported | 10 | 124-3p,15a-5p,15b-5p,16-5p,29b-3p,29c-3p,30b-5p,362-3p,584-3p,7976                 |
| MAP3K9 | Serine/threonine kinase acts as an essential component of the MAP kinase signal transduction pathway. Plays an important role in the cascades of cellular responses evoked by changes in the environment | Not reported | 10 | 1248,190a-5p,218-5p,301a-3p,3158-3p,339-5p,34a-5p,454-3p,500a-5p,6734-5p           |
| SETD7  | Histone methyltransferase for epigenetic transcriptional activation.                                                                                                                                     | Not reported | 10 | 151a-3p,4659b-3p,548ab,548ad-5p,548am-5p,548au-5p,548ay-5p,548b-5p,548c-5p,548d-5p |
| ITGB8  | Extracellular matrix protein binding                                                                                                                                                                     | Not reported | 10 | 3613-3p,548ab,548ad-5p,548am-5p,548au-5p,548ay-5p,548b-5p,548c-5p,548d-5p,590-5p   |

**Table S6.** Real-time PCR analysis after miRNA KO in HUDEP2 cells.  $\Delta$ Ct= Ct of target-Ct of U6 (control).  $\Delta\Delta$ Ct=  $\Delta$ Ct in the KO cells- $\Delta$ Ct in the control cells. FC= fold change in the expression calculated by the  $2^{-\Delta\Delta$ Ct} method. \* When the Ct values were undermined due to very low expression, a value of 40 was denoted for calculation.

| d-sgRNA   | miRNA    | Target Ct |       | U6 Ct |      | $\Delta$ Ct  |               | $\Delta\Delta$ Ct  |                    | FC          |             |
|-----------|----------|-----------|-------|-------|------|--------------|---------------|--------------------|--------------------|-------------|-------------|
|           |          | Ct 1      | Ct 2  | Ct 1  | Ct 2 | $\Delta$ Ct1 | $\Delta$ Ct 2 | $\Delta\Delta$ Ct1 | $\Delta\Delta$ Ct2 | FC1         | FC2         |
| d-sgRNA1  | miR-182  | 40.0*     | 40.0* | 10.1  | 10.0 | 29.9         | 30.0          | 13.45              | 14.433             | 0.000089    | 0.0000452   |
| d-sgRNA2  | miR-182  | 29.9      | 30.1  | 8.0   | 7.8  | 21.9         | 22.2          | 5.524              | 6.71               | 0.0217325   | 0.00955189  |
| Scrambled | miR-182  | 25.5      | 25.5  | 9.1   | 10.0 | 16.4         | 15.5          | 0                  | 0                  | 1           | 1           |
| d-sgRNA1  | miR-144  | 29.4      | 29.7  | 9.3   | 9.3  | 20.0         | 20.4          | 13.28              | 11.77              | 0.0001      | 0.00028     |
| d-sgRNA2  | miR-144  | 35.6      | 36.1  | 9.3   | 9.4  | 26.3         | 26.7          | 19.64              | 18.03              | 0.0000012   | 0.0000037   |
| Scrambled | miR-144  | 17.3      | 17.1  | 9.1   | 10.0 | 8.2          | 7.1           | 0                  | 0                  | 1           | 1           |
| d-sgRNA1  | miR-183  | 35.1      | 35.0  | 9.3   | 9.4  | 25.9         | 25.7          | 9.452              | 8.766              | 0.0014      | 0.0022      |
| d-sgRNA2  | miR-183  | 39.5      | 38.4  | 9.5   | 9.5  | 30.0         | 28.9          | 12.71              | 12.89              | 0.00014     | 0.000131    |
| Scrambled | miR-183  | 26.2      | 26.2  | 9.1   | 10.0 | 17.1         | 16.2          | 0                  | 0                  | 1           | 1           |
| d-sgRNA1  | miR-451  | 40.0*     | 40.0* | 9.6   | 9.7  | 30.4         | 30.3          | 22.402             | 22.91              | 0.00000018  | 1.2688E-07  |
| Scrambled | miR-451  | 17.1      | 17.4  | 9.1   | 10.0 | 8.0          | 7.4           | 0                  | 0                  | 1           | 1           |
| d-sgRNA1  | miR-96   | 39.1      | 40.0* | 5.2   | 5.0  | 33.9         | 34.1          | 17.573             | 18.315             | 0.000005128 | 3.06562E-06 |
| Scrambled | miR-96   | 25.4      | 25.8  | 9.1   | 10.0 | 16.3         | 15.8          | 0                  | 0                  | 1           | 1           |
| d-sgRNA1  | miR-4732 | 32.4      | 32.8  | 9.6   | 9.7  | 22.9         | 23.2          | 11.686             | 11.11              | 0.000303503 | 0.000452122 |
| Scrambled | miR-4732 | 22.1      | 22.3  | 10.9  | 10.3 | 11.2         | 12.0          | 0                  | 0                  | 1           | 1           |
| d-sgRNA1  | miR-215  | 38.7      | 38.7  | 10.4  | 10.4 | 28.4         | 28.3          | 8.46               | 7.839              | 0.002839788 | 0.004367427 |
| Scrambled | miR-215  | 30.8      | 30.7  | 10.9  | 10.3 | 19.9         | 20.5          | 0                  | 0                  | 1           | 1           |

---

|           |         |      |      |      |      |      |      |        |       |             |             |
|-----------|---------|------|------|------|------|------|------|--------|-------|-------------|-------------|
| d-sgRNA1  | miR-486 | 27.0 | 27.0 | 9.0  | 9.1  | 18.0 | 17.9 | 10.514 | 9.439 | 0.000683865 | 0.001440714 |
| Scrambled | miR-486 | 18.5 | 18.8 | 10.9 | 10.3 | 7.5  | 8.5  | 0      | 0     | 1           | 1           |
| d-sgRNA1  | miR-496 | 35.5 | 34.9 | 10.3 | 9.3  | 25.2 | 25.6 | 7.898  | 8.032 | 0.004192418 | 0.003820564 |
| Scrambled | miR-496 | 28.3 | 27.9 | 10.9 | 10.3 | 17.3 | 17.6 | 0      | 0     | 1           | 1           |
| d-sgRNA1  | miR-430 | 25.5 | 25.4 | 9.5  | 10.4 | 16.0 | 15.0 | 6.639  | 5.245 | 0.010033711 | 0.026369228 |
| Scrambled | miR-430 | 20.3 | 20.0 | 10.9 | 10.3 | 9.3  | 9.7  | 0      | 0     | 1           | 1           |

---
